# Supplementary material for: A Weak Shadow of Early Life Language Processing Persists in the Right Hemisphere of the Mature Brain
Source: PubMed Central journal article supplement (PMC9169899; doi:10.1162/nol_a_00069), 2022-05-20
Supplement: nol-3-3-364-s001.pdf [file nol-3-3-364-s001.pdf]

## Supplementary Materials for:

A weak shadow of early life language processing persists in the right hemisphere of the mature brain.

Kelly C. Martin, Anna Seydell-Greenwald, Madison M. Berl, William D. Gaillard, Peter E. Turkeltaub, Elissa L. Newport

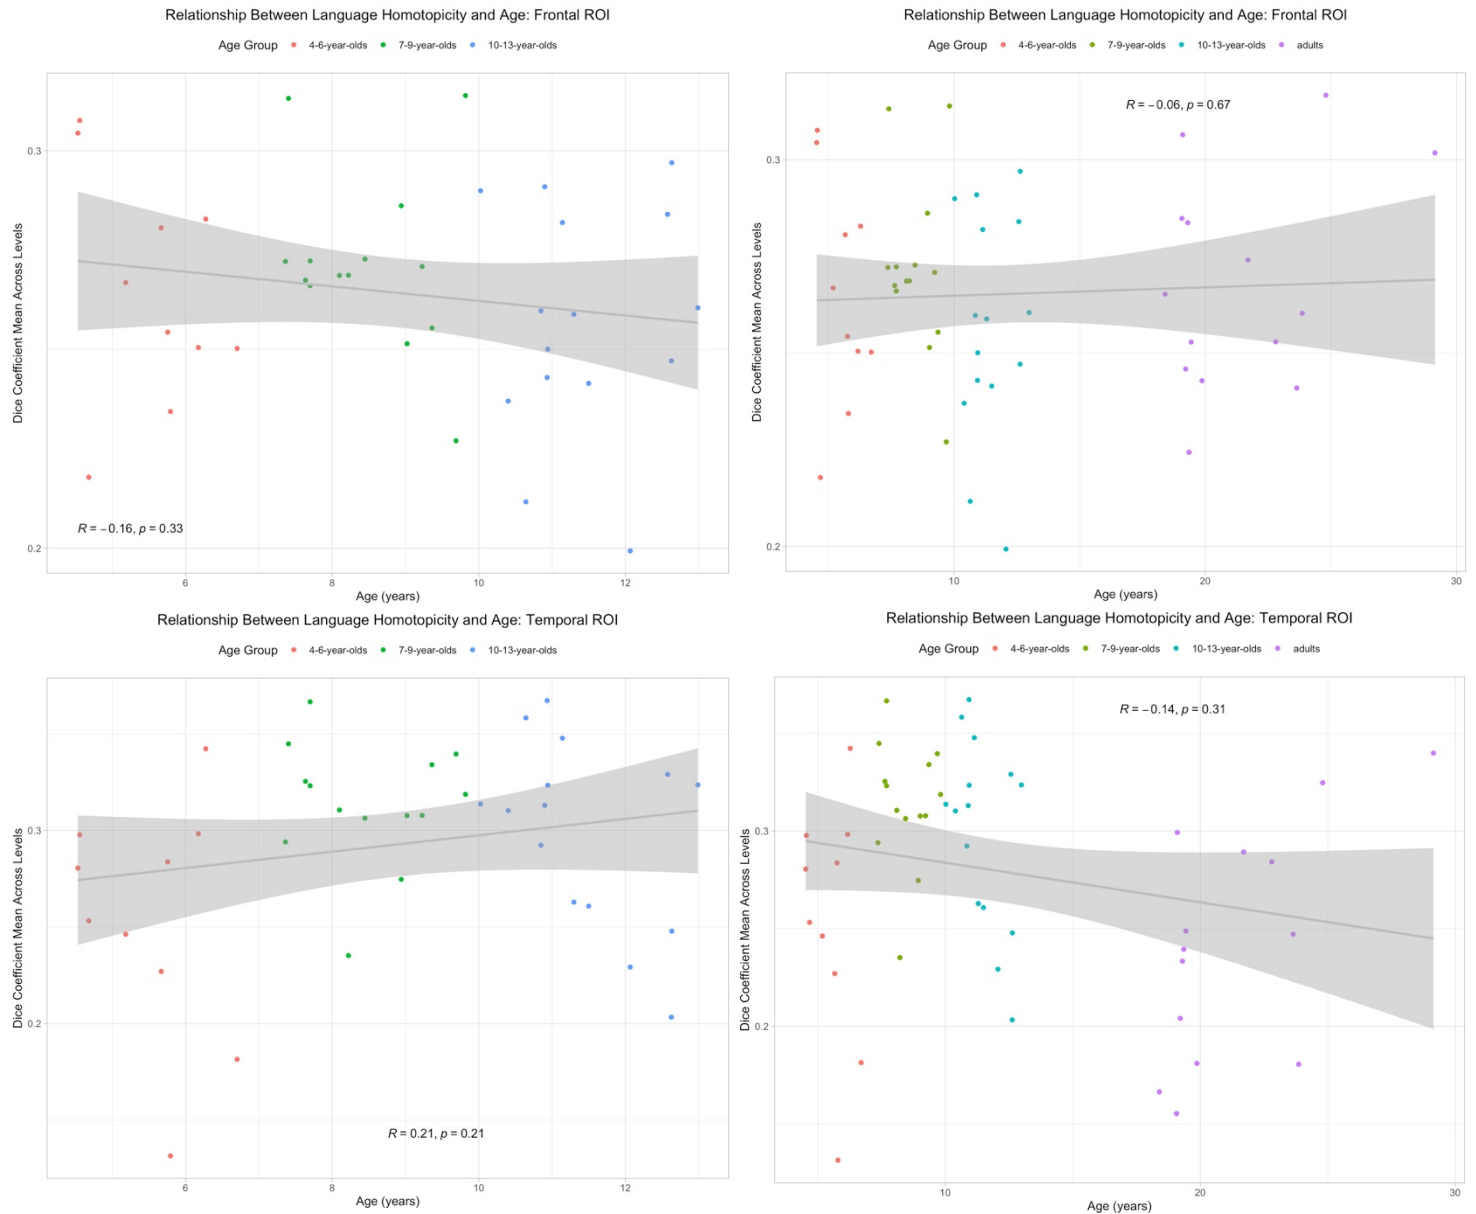

**Figure S1. Homotopy Correlations with Age (with and without Adults).** The average Dice Coefficient across the four top voxel cutoffs tested, our measure of homotopic activation during language processing, was correlated with age for the three groups of children (left two plots) and for the children and adults (right two plots) in the frontal (top row) and temporal (bottom row) regions of interest. There were no significant relationships between the Dice Coefficients and age, convergent with our ANOVA results on the mean Dice Coefficients for each group (Figure 2, Tables 4 and 5).

Relationship Between Language Homotopy and Activity Magnitude in the Frontal ROI

Age Group 4-6-year-olds 7-9-year-olds 10-13-year-olds adults

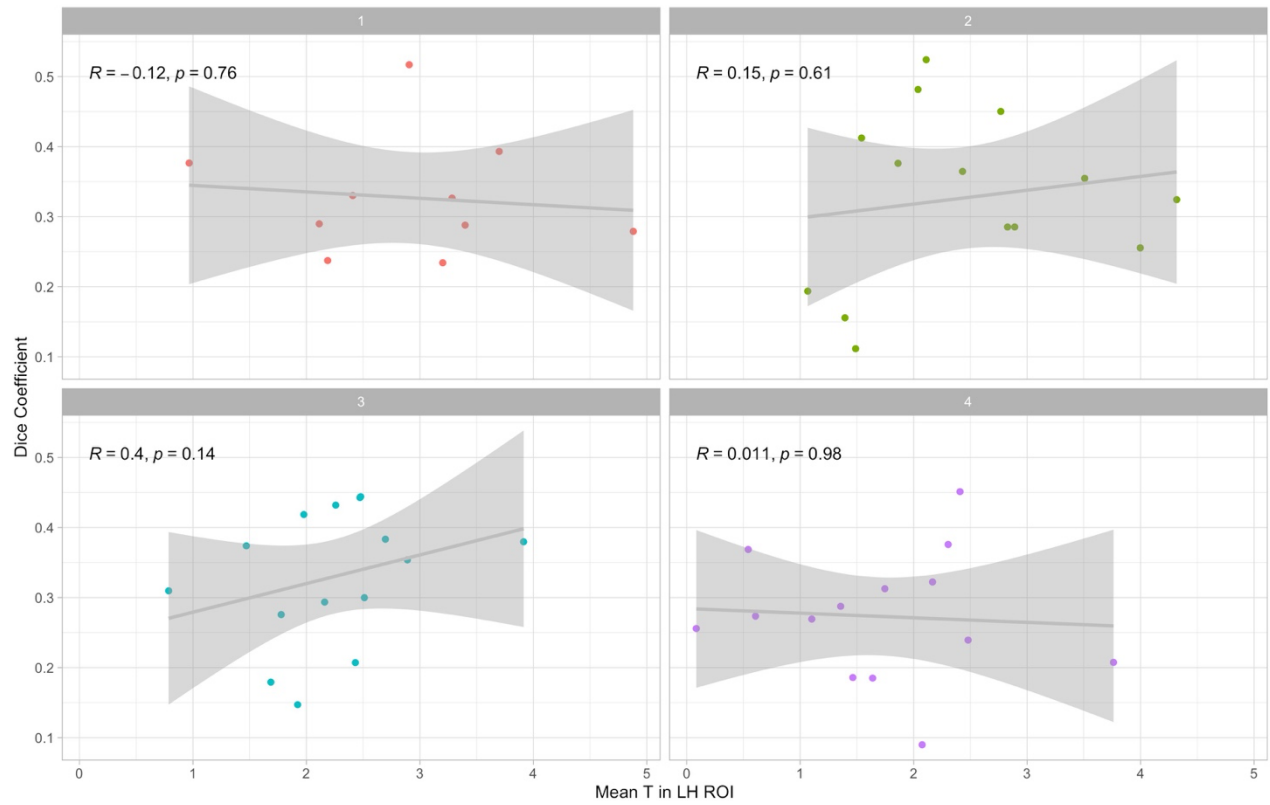

Relationship Between Language Homotopy and Activity Magnitude in the Temporal ROI

Age Group 4-6-year-olds 7-9-year-olds 10-13-year-olds adults

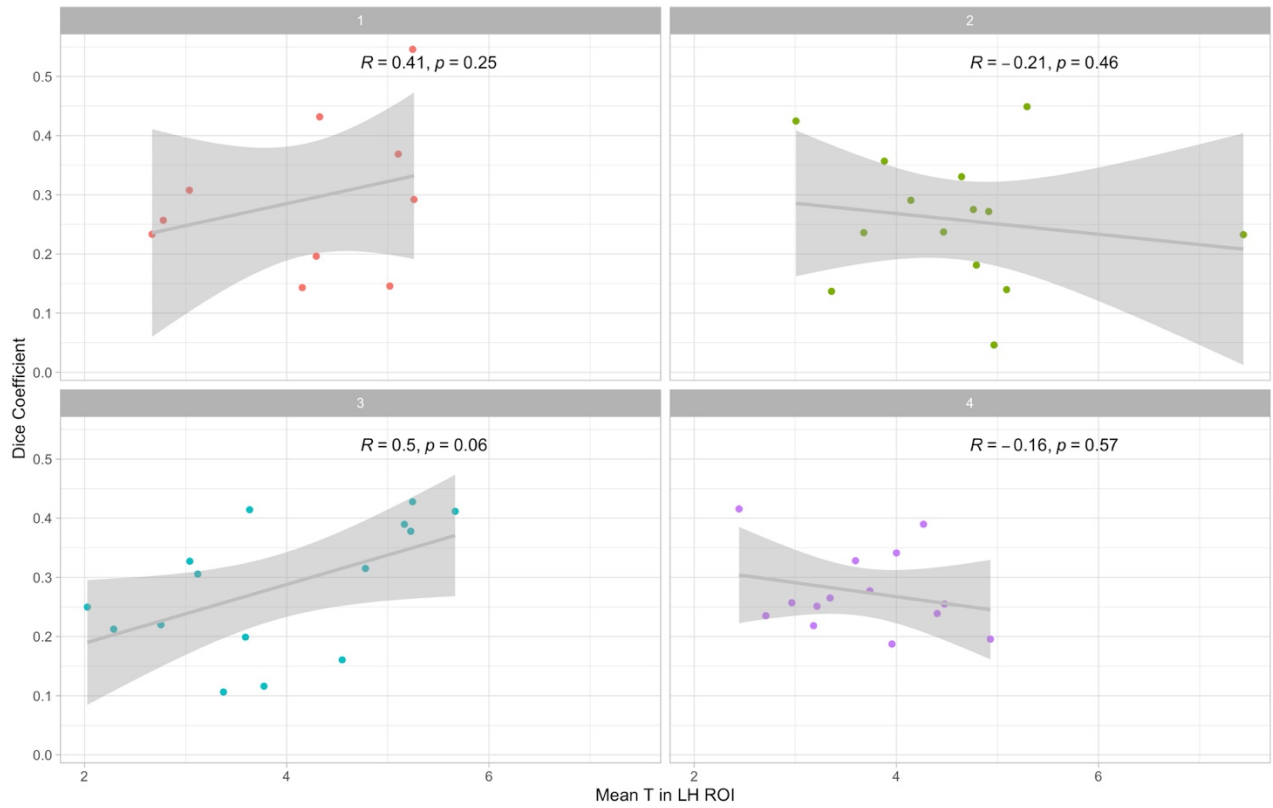

**Figure S2. Homotopicity Correlations with Mean T in LH ROI.** The average Dice Coefficient across the four top voxel cutoffs tested, our measure of homotopic activation during language processing, was correlated with the magnitude of activation (mean T) in the top voxels included for the left hemisphere ROIs in the spatial overlap analysis for each age group in the frontal (top four plots) and temporal (bottom four plots) regions of interest. There were no significant relationships between the Dice Coefficients and activity magnitude in left hemisphere frontal or temporal regions, although the 10-13-year-olds had a trending positive relationship in the temporal ROI ( $R=0.5$ ,  $p=0.06$ ). We conclude from these results that the strength of activity in the dominant left hemisphere language regions does not drive the spatial overlap with homotopic right hemisphere regions.

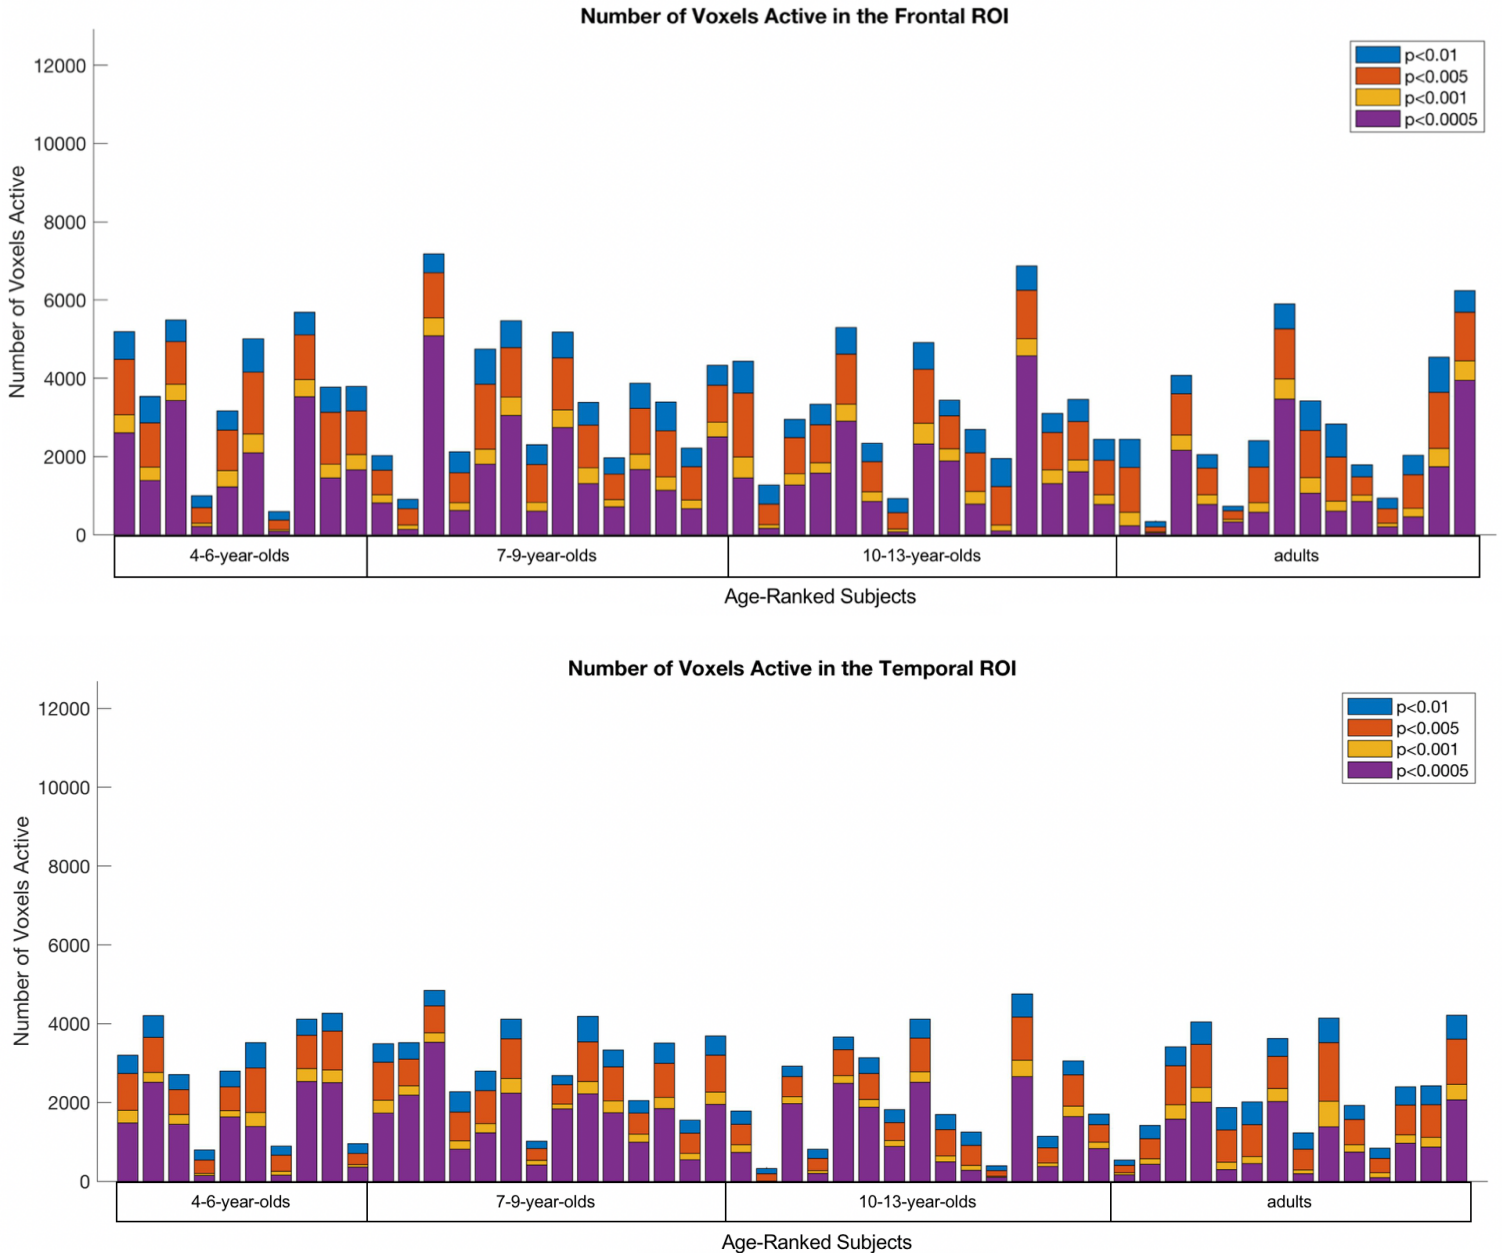

**Figure S3. Number of Active Voxels at Each Cutoff.** To calculate the number of top voxels to include in our spatial overlap analysis for all participants, we first thresholded each participant's Forward>Reverse Speech statistical map at four statistical cutoffs ( $p<0.01$ ,  $p<0.005$ ,  $p<0.001$ ,  $p<0.0005$ ) and counted the number of voxels that surpassed the threshold in the left hemisphere frontal and temporal ROIs respectively at each cutoff for each participant (see also Figure 1). The voxel counts for each participant at each of these statistical thresholds are visualized here, and are listed in Table S1. We then found the average number of active voxels across all participants at each threshold to determine the four top voxel cutoffs used in our spatial overlap analysis.

## Frontal ROI

| 4-6-year-olds   |       |      |      |       |      |      |      |      |      |      |      |      |      |      |      |
|-----------------|-------|------|------|-------|------|------|------|------|------|------|------|------|------|------|------|
| p<              | p1583 | p130 | p129 | p126  | p125 | p180 | p154 | p192 | p167 | p117 |      |      |      |      |      |
| 0.01            | 5186  | 3540 | 5486 | 1002  | 3168 | 5010 | 591  | 5683 | 3770 | 3793 |      |      |      |      |      |
| 0.005           | 4477  | 2856 | 4935 | 692   | 2680 | 4157 | 375  | 5107 | 3133 | 3168 |      |      |      |      |      |
| 0.001           | 3067  | 1735 | 3848 | 299   | 1642 | 2576 | 131  | 3963 | 1811 | 2054 |      |      |      |      |      |
| 0.0005          | 2601  | 1392 | 3427 | 210   | 1231 | 2100 | 85   | 3533 | 1453 | 1660 |      |      |      |      |      |
| 7-9-year-olds   |       |      |      |       |      |      |      |      |      |      |      |      |      |      |      |
| p<              | p110  | p143 | p146 | p1631 | p164 | p162 | p124 | p101 | p123 | p169 | p136 | p165 | p128 | p115 |      |
| 0.01            | 2025  | 914  | 7183 | 2129  | 4745 | 5466 | 2303 | 5175 | 3387 | 1968 | 3874 | 3397 | 2216 | 4323 |      |
| 0.005           | 1658  | 670  | 6699 | 1589  | 3850 | 4780 | 1800 | 4520 | 2809 | 1550 | 3227 | 2656 | 1740 | 3819 |      |
| 0.001           | 1028  | 248  | 5543 | 821   | 2192 | 3519 | 830  | 3197 | 1714 | 905  | 2058 | 1480 | 893  | 2877 |      |
| 0.0005          | 815   | 137  | 5081 | 624   | 1807 | 3046 | 606  | 2744 | 1313 | 710  | 1676 | 1140 | 666  | 2502 |      |
| 10-13-year-olds |       |      |      |       |      |      |      |      |      |      |      |      |      |      |      |
| p<              | p106  | p119 | p147 | p108  | p111 | p132 | p170 | p113 | p139 | p127 | p171 | p105 | p140 | p151 | p176 |
| 0.01            | 4435  | 1275 | 2953 | 3338  | 5297 | 2339 | 930  | 4911 | 3435 | 2698 | 1953 | 6872 | 3101 | 3459 | 2439 |
| 0.005           | 3618  | 788  | 2484 | 2811  | 4617 | 1875 | 568  | 4228 | 3038 | 2098 | 1233 | 6246 | 2611 | 2897 | 1910 |
| 0.001           | 1989  | 260  | 1567 | 1848  | 3338 | 1103 | 152  | 2850 | 2199 | 1106 | 247  | 5008 | 1664 | 1918 | 1033 |
| 0.0005          | 1452  | 164  | 1273 | 1578  | 2902 | 854  | 67   | 2321 | 1892 | 780  | 93   | 4568 | 1311 | 1618 | 773  |
| Adults          |       |      |      |       |      |      |      |      |      |      |      |      |      |      |      |
| p<              | a101  | a103 | a104 | a105  | a106 | a107 | a108 | a109 | a110 | a112 | a113 | a114 | a115 | a117 |      |
| 0.01            | 2442  | 338  | 4070 | 2055  | 726  | 2410 | 5907 | 3417 | 2828 | 1788 | 934  | 2036 | 4536 | 6239 |      |
| 0.005           | 1723  | 200  | 3598 | 1709  | 608  | 1732 | 5262 | 2671 | 1987 | 1485 | 664  | 1533 | 3636 | 5683 |      |
| 0.001           | 578   | 65   | 2554 | 1026  | 396  | 819  | 3985 | 1467 | 866  | 1015 | 295  | 673  | 2205 | 4445 |      |
| 0.0005          | 233   | 40   | 2160 | 775   | 329  | 571  | 3463 | 1064 | 604  | 860  | 206  | 457  | 1740 | 3944 |      |

| Frontal Cutoffs |
|-----------------|
| 3,311           |
| 2,763           |
| 1,794           |
| 1,484           |

## Temporal ROI

| 4-6-year-olds   |       |      |      |       |      |      |      |      |      |      |      |      |      |      |      |
|-----------------|-------|------|------|-------|------|------|------|------|------|------|------|------|------|------|------|
| p<              | p1583 | p130 | p129 | p126  | p125 | p180 | p154 | p192 | p167 | p117 |      |      |      |      |      |
| 0.01            | 3201  | 4201 | 2710 | 794   | 2801 | 3514 | 891  | 4111 | 4269 | 953  |      |      |      |      |      |
| 0.005           | 2733  | 3651 | 2323 | 539   | 2400 | 2878 | 662  | 3705 | 3811 | 707  |      |      |      |      |      |
| 0.001           | 1800  | 2763 | 1692 | 201   | 1790 | 1752 | 254  | 2861 | 2821 | 419  |      |      |      |      |      |
| 0.0005          | 1479  | 2514 | 1448 | 143   | 1629 | 1393 | 157  | 2534 | 2507 | 362  |      |      |      |      |      |
| 7-9-year-olds   |       |      |      |       |      |      |      |      |      |      |      |      |      |      |      |
| p<              | p110  | p143 | p146 | p1631 | p164 | p162 | p124 | p101 | p123 | p169 | p136 | p165 | p128 | p115 |      |
| 0.01            | 3489  | 3516 | 4848 | 2270  | 2799 | 4118 | 1017 | 2683 | 4188 | 3335 | 2050 | 3506 | 1551 | 3687 |      |
| 0.005           | 3018  | 3100 | 4456 | 1754  | 2296 | 3615 | 830  | 2448 | 3533 | 2908 | 1728 | 2989 | 1220 | 3200 |      |
| 0.001           | 2056  | 2421 | 3769 | 1024  | 1461 | 2613 | 530  | 1960 | 2530 | 2043 | 1195 | 2129 | 707  | 2262 |      |
| 0.0005          | 1732  | 2188 | 3528 | 818   | 1232 | 2234 | 418  | 1833 | 2222 | 1741 | 991  | 1850 | 547  | 1952 |      |
| 10-13-year-olds |       |      |      |       |      |      |      |      |      |      |      |      |      |      |      |
| p<              | p106  | p119 | p147 | p108  | p111 | p132 | p170 | p113 | p139 | p127 | p171 | p105 | p140 | p151 | p176 |
| 0.01            | 1780  | 326  | 2923 | 810   | 3663 | 3136 | 1818 | 4116 | 1693 | 1248 | 392  | 4754 | 1145 | 3054 | 1701 |
| 0.005           | 1447  | 187  | 2656 | 582   | 3338 | 2738 | 1491 | 3634 | 1308 | 910  | 272  | 4166 | 851  | 2696 | 1434 |
| 0.001           | 929   | 7    | 2148 | 268   | 2684 | 2081 | 1037 | 2783 | 649  | 409  | 130  | 3069 | 466  | 1905 | 996  |
| 0.0005          | 732   | 0    | 1971 | 197   | 2483 | 1877 | 887  | 2509 | 498  | 276  | 99   | 2656 | 376  | 1637 | 830  |
| Adults          |       |      |      |       |      |      |      |      |      |      |      |      |      |      |      |
| p<              | a101  | a103 | a104 | a105  | a106 | a107 | a108 | a109 | a110 | a112 | a113 | a114 | a115 | a117 |      |
| 0.01            | 1701  | 540  | 1415 | 3415  | 4039 | 1869 | 2014 | 3626 | 1231 | 4138 | 1922 | 845  | 2399 | 2425 |      |
| 0.005           | 1434  | 402  | 1080 | 2932  | 3473 | 1304 | 1433 | 3175 | 812  | 3517 | 1566 | 584  | 1932 | 1942 |      |
| 0.001           | 996   | 214  | 577  | 1941  | 2378 | 481  | 628  | 2351 | 289  | 2036 | 930  | 217  | 1175 | 1113 |      |

| Temporal Cutoffs |
|------------------|
| 2,588            |
| 2,188            |
| 1,498            |
| 1,278            |

**Table S1. Numerical derivations of the Number of Voxels Analyzed in Regions of Interest.** The voxel counts for each participant at four statistical thresholds are listed, and are also visualized in Figure S3 (see Figure 1 and Figure S3 caption for full description).

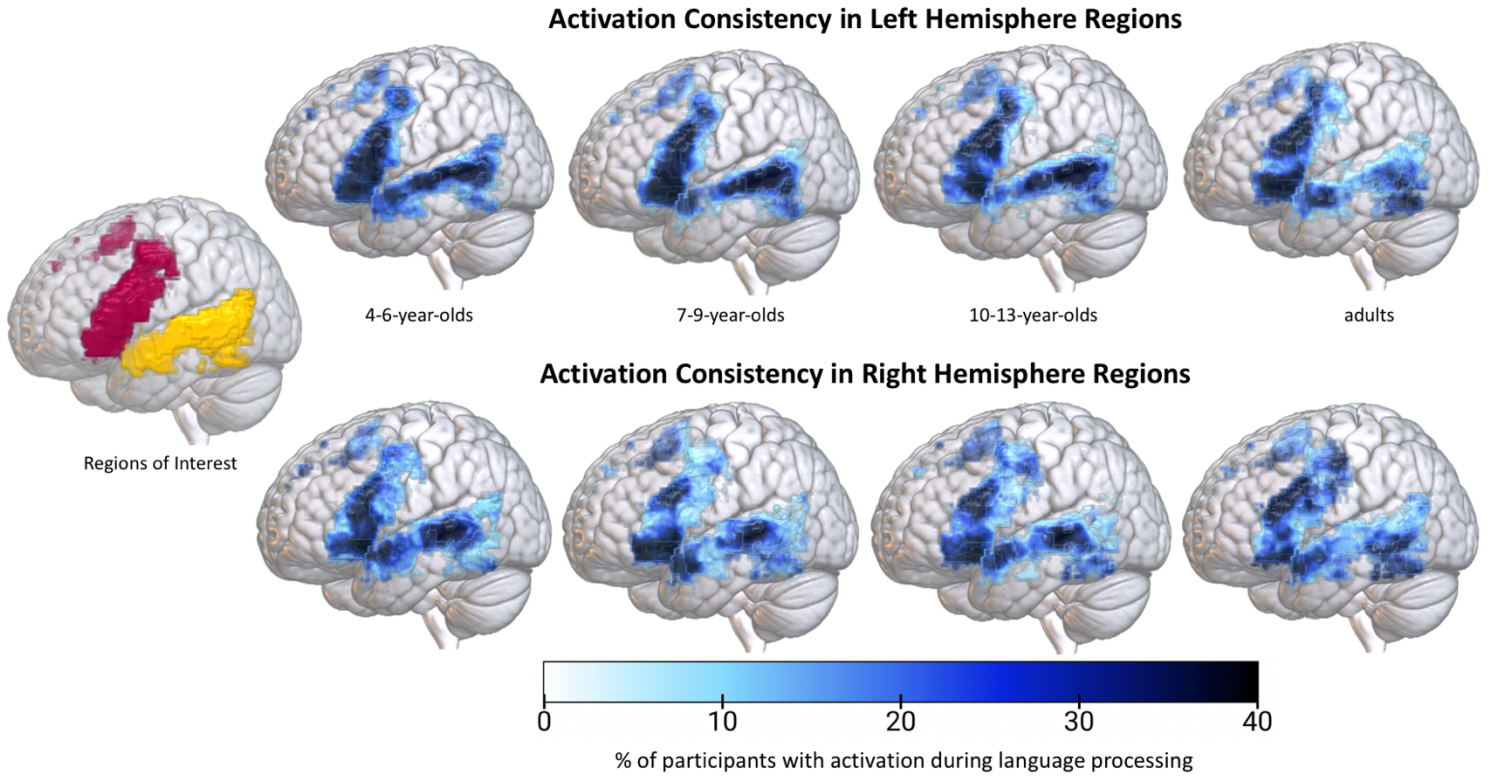

**Figure S4. Penetrance Maps of Left and Right Hemisphere Consistency.** The top voxel maps for the left and right hemisphere ROIs were each merged across participants in each age group, for the Level 1 top voxel cutoff (the top 3,311 and 2,588 voxels in the frontal and temporal regions respectively; ROI coverage displayed on the left). Darker blue areas reflect regions of greater consistency in the localization of language activity between participants in the age group, and lighter blue areas reflect greater variance between participants in the age group.



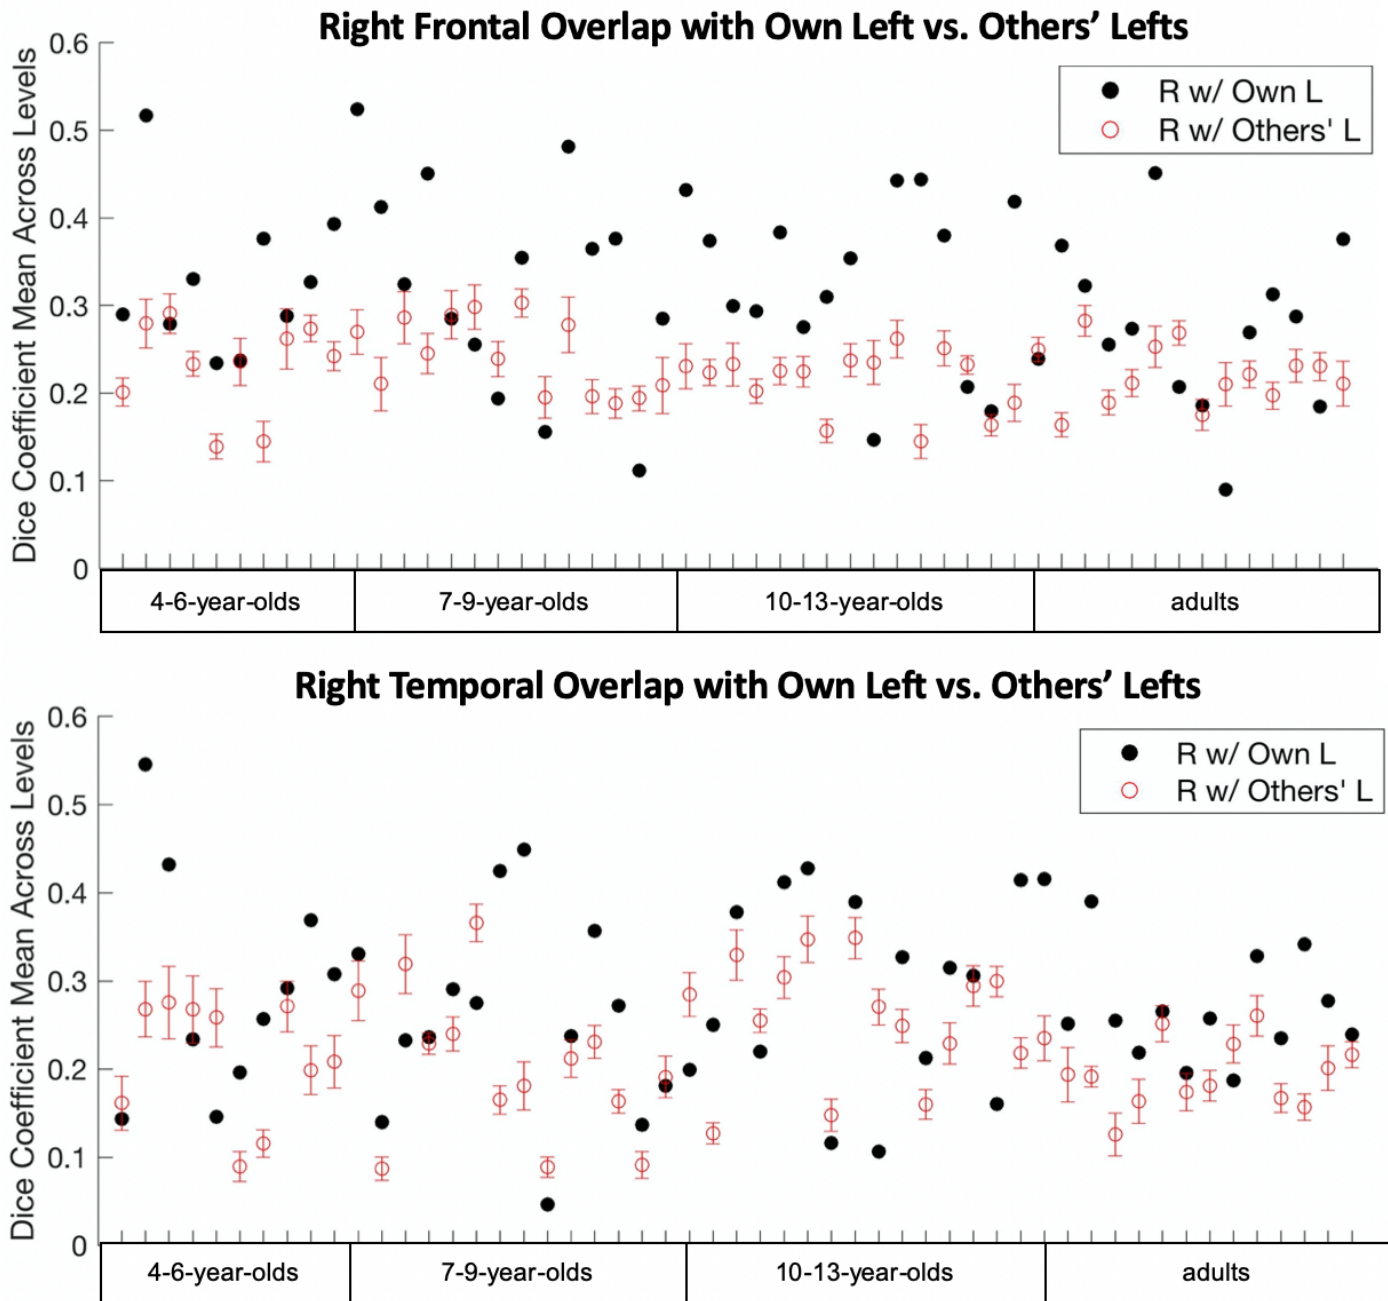

**Figure S5. Individual Participant Data for Homotopicity and RH Overlap with Others' LH Activity.** For each participant in an age group, we compared the overlap of the activity in their right with their own left hemisphere (homotopicity; black dots) to the overlap between their right with all other participants' left hemispheres in the age group (red circles with error bars showing standard error) to interpret whether within-participant homotopicity was greater than between-subjects right-left overlap. The group averages are reported in Figure 3 and Table 3, and statistical comparisons are reported in Tables 6 and 7. Here we show the data for the individual participants that contributed to the group averages we reported in the main paper, visualizing that the black dots representing individual homotopicity fall considerably above the red circles representing overlap with others' LHs for the majority of individuals regardless of age. There is greater consistency (qualitatively) in the between-subjects right-left overlap in the frontal ROI than in the temporal ROI; the larger number of voxels being compared for the frontal ROIs may drive this effect.
